# Supplementary material
Source: PubMed Central journal article supplement (PMC2683165)
Supplement: NIHMS109069-supplement-Arrays.pdf [file NIHMS109069-supplement-Arrays.pdf]

# Synthesis and characterization of polydiacetylene films and nanotubes

Erastus Gatebe,<sup>1</sup> Hayley Herron,<sup>1</sup> Rashid Zakeri,<sup>1</sup> R. Pradeep,<sup>1</sup> Samir Aouadi,<sup>2</sup> and Punit  
Kohli<sup>1\*</sup>

<sup>1</sup>Department of Chemistry and Biochemistry, and <sup>2</sup>Department of Physics

Southern Illinois University

Carbondale, IL 62901

\*pkohli@chem.siu.edu

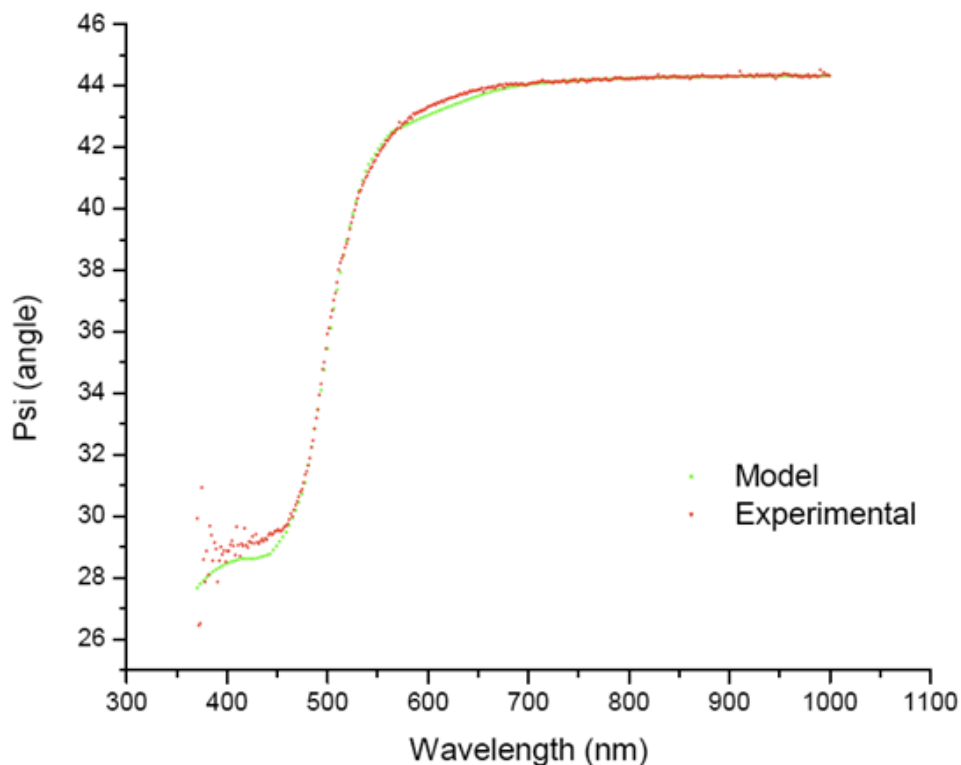

**Figure 1S.** Comparison of experimental and theoretical ellipsometric  $\psi$ -versus- $\lambda$  data for a 47 nm thick PDCDA film.

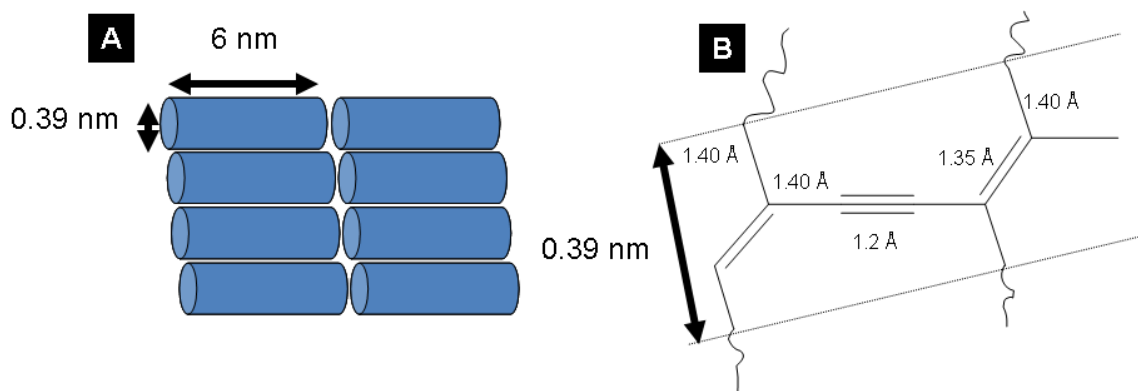

**Figure 2S.** The chromophore density is calculated by assuming that the PDCDA are: (1) cylindrical in shape; (2) closed packed; and (3) laying parallel to one another on the surface. The dimensions of the cylinder are 6 nm x 0.39 nm. The molecular modeling of DCDA and PDCDA was performed on Gaussian 03 (basis set ZDO and the method used was PM3).

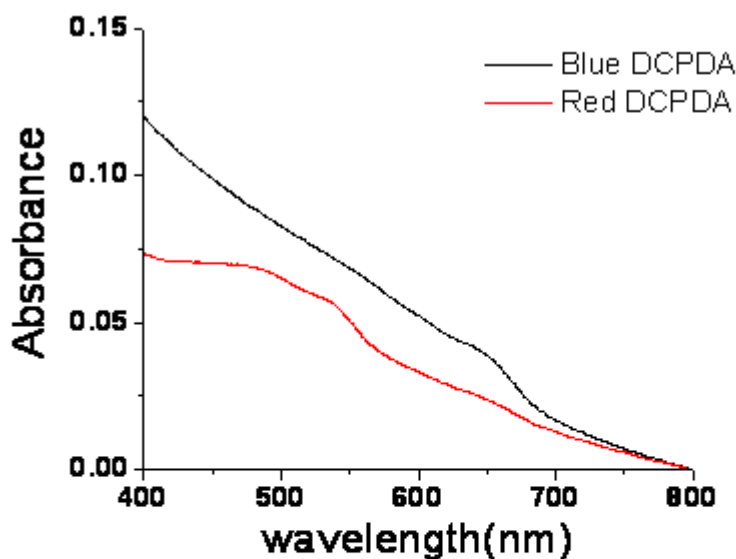

**Figure 3S.** Comparison of absorption spectra of as-prepared and heated PDCDA films grown on glass substrate. The films are heated with heat gun for 2 minutes.
